# Supplementary material for: The relationships of genetic polymorphisms of the long noncoding RNA growth arrest-specific transcript 5 with uterine cervical cancer
Source: PubMed Central journal article supplement (PMC7294910; doi:10.7150/ijms.44583), 2020-05-18
Supplement: ijmsv17p1187s1.pdf [file ijmsv17p1187s1.pdf]

**Supplement Table 1. The distributions of GAS5 genetic polymorphism among all cancer stage subdivisions (stage I, II, III and IV) in patients with uterine cervical cancer**

| GAS5 genetic polymorphisms                            | Stage I <sup>a</sup> | Stage II           | Stage III           | Stage IV         | <i>p</i> value |
|-------------------------------------------------------|----------------------|--------------------|---------------------|------------------|----------------|
| rs145204276                                           |                      |                    |                     |                  | 0.810          |
| Ins/Ins <sup>b</sup>                                  | 27                   | 12                 | 5                   | 3                |                |
| Ins/Del                                               | 24                   | 17                 | 4                   | 3                |                |
| Del/Del                                               | 11                   | 4                  | 0                   | 1                |                |
| OR (95% CI) Ins/Del vs Ins/Ins <sup>b</sup>           | 1.00                 | 1.59 (0.63-4.00)   | 0.90 (0.22-3.74)    | 1.13 (0.21-6.11) |                |
| & <i>p</i> value                                      |                      | 0.321              | 0.885               | 0.891            |                |
| OR (95% CI) Del/Del vs Ins/Ins <sup>b</sup>           | 1.00                 | 0.82 (0.22-3.10)   | u.a                 | 0.82 (0.08-8.75) |                |
| & <i>p</i> value                                      |                      | 0.768              | u.a                 | 0.868            |                |
| Ins/Ins <sup>b</sup>                                  | 27                   | 12                 | 5                   | 3                | 0.746          |
| Ins/Del & Del/Del                                     | 35                   | 21                 | 4                   | 4                |                |
| OR (95% CI) Ins/Del & Del/Del vs Ins/Ins <sup>b</sup> | 1.00                 | 1.35 (0.57-3.22)   | 0.62 (0.15-2.52)    | 1.03 (0.21-4.99) |                |
| & <i>p</i> value                                      |                      | 0.498              | 0.501               | 0.972            |                |
| Ins/Ins & Ins/Del <sup>b</sup>                        | 51                   | 29                 | 9                   | 6                | 0.614          |
| Del/Del                                               | 11                   | 4                  | 0                   | 1                |                |
| OR (95% CI) Del/Del vs Ins/Ins & Ins/Del <sup>b</sup> | 1.00                 | 0.64 (0.19-2.19)   | u.a.                | 0.77 (0.08-7.08) |                |
| & <i>p</i> value                                      |                      | 0.477              | u.a.                | 0.820            |                |
| rs55829688                                            |                      |                    |                     |                  | 0.022          |
| TT <sup>b</sup>                                       | 35                   | 13                 | 1                   | 5                |                |
| TC                                                    | 18                   | 18                 | 8                   | 2                |                |
| CC                                                    | 4                    | 1                  | 0                   | 0                |                |
| OR (95% CI) TC vs TT <sup>b</sup>                     | 1.00                 | 2.69 (1.08-6.70)   | 15.56 (1.80-134.24) | 0.78 (0.14-4.41) |                |
| & <i>p</i> value                                      |                      | 0.033 <sup>*</sup> | 0.013 <sup>*</sup>  | 0.777            |                |
| OR (95% CI) CC vs TT <sup>b</sup>                     | 1.00                 | 0.67 (0.07-6.59)   | u.a.                | u.a.             |                |
| & <i>p</i> value                                      |                      | 0.734              | u.a.                | u.a.             |                |
| TT <sup>b</sup>                                       | 35                   | 13                 | 1                   | 5                | 0.011          |
| TC/CC                                                 | 22                   | 19                 | 8                   | 2                |                |
| OR (95% CI) TC/CC vs TT <sup>b</sup>                  | 1.00                 | 2.33 (0.96-5.63)   | 12.73 (1.49-108.84) | 0.64 (0.11-3.57) |                |
| & <i>p</i> value                                      |                      | 0.061              | 0.020 <sup>*</sup>  | 0.607            |                |
| TT/TC <sup>b</sup>                                    | 53                   | 31                 | 9                   | 7                | 0.850          |
| CC                                                    | 4                    | 1                  | 0                   | 0                |                |
| OR (95% CI) CC vs TT/TC <sup>b</sup>                  | 1.00                 | 0.43 (0.05-4.00)   | u.a.                | u.a.             |                |

Statistical analysis Fisher's exact test and multinomial logistic regression model

\*  $P < 0.05$

<sup>a</sup>Used as a reference for comparison to define the odds ratios of other stages.

<sup>b</sup>Used as a reference for comparison to define the odds ratios of other genotypes.

GAS5, growth arrest-specific transcript; OR, odds ratio; 95% CI, 95% confidence interval; u.a., unavailable
